# Supplementary material for: Solid-state photochromism and thermochromism of N-salicylidene pyrene derivatives
Source: Royal Society of Chemistry journal article supplement (doi:10.1039/c4ce01325e), 2014-08-11
Supplement: c4ce01325e1.pdf [file c4ce01325e1.pdf]

## Electronic Supplementary Information

### Solid state photochromism and thermochromism in *N*-salicylidene pyrene derivatives

Damir A. Safin,<sup>a</sup> Michael Bolte<sup>b</sup> and Yann Garcia<sup>\*a</sup>

<sup>a</sup> Institute of Condensed Matter and Nanosciences, Molecules, Solids and Reactivity (IMCN/MOST), Université Catholique de Louvain, Place L. Pasteur 1, 1348 Louvain-la-Neuve, Belgium. Fax: +32(0) 1047 2330; Tel: +32(0) 1047 2831; E-mail: yann.garcia@uclouvain.be

<sup>b</sup> Institut für Anorganische Chemie J.-W.-Goethe-Universität, Frankfurt/Main, Germany

**Table S1** Selected bond lengths (Å) and bond angles (°) for **2**

| <i>Bond lengths</i>   |           |                      |          |                   |          |
|-----------------------|-----------|----------------------|----------|-------------------|----------|
| Cl(1)–C(25)           | 1.741(3)  | C(5)–C(6)            | 1.432(4) | C(13)–C(14)       | 1.390(4) |
| O(1)–C(22)            | 1.337(3)  | C(6)–C(7)            | 1.391(4) | C(13)–C(17)       | 1.420(4) |
| N(1)–C(1)             | 1.281(4)  | C(6)–C(16)           | 1.423(4) | C(14)–C(15)       | 1.377(4) |
| N(1)–C(2)             | 1.410(4)  | C(7)–C(8)            | 1.385(5) | C(16)–C(17)       | 1.422(4) |
| C(1)–C(21)            | 1.450(4)  | C(8)–C(9)            | 1.374(4) | C(21)–C(22)       | 1.420(4) |
| C(2)–C(3)             | 1.408(4)  | C(9)–C(10)           | 1.400(4) | C(21)–C(26)       | 1.388(4) |
| C(2)–C(15)            | 1.402(4)  | C(10)–C(11)          | 1.434(4) | C(22)–C(23)       | 1.381(4) |
| C(3)–C(4)             | 1.437(4)  | C(10)–C(16)          | 1.420(4) | C(23)–C(24)       | 1.393(4) |
| C(3)–C(17)            | 1.424(4)  | C(11)–C(12)          | 1.341(5) | C(24)–C(25)       | 1.387(4) |
| C(4)–C(5)             | 1.346(4)  | C(12)–C(13)          | 1.435(4) | C(25)–C(26)       | 1.378(4) |
| <i>Bond angles</i>    |           |                      |          |                   |          |
| C(1)–N(1)–C(2)        | 120.9(2)  | C(8)–C(9)–C(10)      | 121.3(3) | C(16)–C(6)–C(5)   | 118.2(2) |
| N(1)–C(1)–C(21)       | 122.0(3)  | C(9)–C(8)–C(7)       | 120.4(3) | C(16)–C(10)–C(11) | 118.9(3) |
| C(3)–C(2)–N(1)        | 118.6(2)  | C(9)–C(10)–C(11)     | 122.6(3) | C(16)–C(17)–C(3)  | 119.9(2) |
| C(15)–C(2)–N(1)       | 121.4(3)  | C(9)–C(10)–C(16)     | 118.6(3) | C(17)–C(3)–C(4)   | 118.5(3) |
| O(1)–C(22)–C(21)      | 121.6(3)  | C(10)–C(16)–C(6)     | 119.7(3) | C(17)–C(13)–C(12) | 118.6(3) |
| O(1)–C(22)–C(23)      | 119.0(2)  | C(10)–C(16)–C(17)    | 120.0(2) | C(17)–C(16)–C(6)  | 120.3(2) |
| C(24)–C(25)–Cl(1)     | 118.9(2)  | C(11)–C(12)–C(13)    | 121.9(3) | C(22)–C(21)–C(1)  | 120.7(2) |
| C(26)–C(25)–Cl(1)     | 120.2(2)  | C(12)–C(11)–C(10)    | 121.0(3) | C(22)–C(23)–C(24) | 120.9(3) |
| C(2)–C(3)–C(4)        | 122.9(2)  | C(13)–C(17)–C(3)     | 120.4(3) | C(23)–C(22)–C(21) | 119.4(2) |
| C(2)–C(3)–C(17)       | 118.7(2)  | C(13)–C(17)–C(16)    | 119.7(2) | C(25)–C(24)–C(23) | 119.1(3) |
| C(4)–C(5)–C(6)        | 122.0(2)  | C(14)–C(13)–C(12)    | 122.4(2) | C(25)–C(26)–C(21) | 120.5(3) |
| C(5)–C(4)–C(3)        | 121.2(3)  | C(14)–C(13)–C(17)    | 119.0(3) | C(26)–C(21)–C(1)  | 120.2(2) |
| C(7)–C(6)–C(5)        | 122.8(2)  | C(14)–C(15)–C(2)     | 121.1(3) | C(26)–C(21)–C(22) | 119.1(3) |
| C(7)–C(6)–C(16)       | 119.1(2)  | C(15)–C(2)–C(3)      | 119.8(3) | C(26)–C(25)–C(24) | 120.9(3) |
| C(8)–C(7)–C(6)        | 120.9(3)  | C(15)–C(14)–C(13)    | 121.0(2) |                   |          |
| <i>Torsion angles</i> |           |                      |          |                   |          |
| C(1)–N(1)–C(2)–C(3)   | –149.8(3) | C(1)–N(1)–C(2)–C(15) | 35.2(5)  |                   |          |

**Table S2** Selected bond lengths (Å) and bond angles (°) for **3**

| <i>Bond lengths</i>   |          |                      |          |                   |          |
|-----------------------|----------|----------------------|----------|-------------------|----------|
| Br(1)–C(25)           | 1.904(5) | C(5)–C(6)            | 1.440(7) | C(13)–C(14)       | 1.402(8) |
| O(1)–C(22)            | 1.348(6) | C(6)–C(7)            | 1.399(7) | C(13)–C(17)       | 1.419(7) |
| N(1)–C(1)             | 1.279(7) | C(6)–C(16)           | 1.410(7) | C(14)–C(15)       | 1.376(7) |
| N(1)–C(2)             | 1.411(6) | C(7)–C(8)            | 1.388(8) | C(16)–C(17)       | 1.427(7) |
| C(1)–C(21)            | 1.452(7) | C(8)–C(9)            | 1.394(8) | C(21)–C(22)       | 1.407(7) |
| C(2)–C(3)             | 1.411(7) | C(9)–C(10)           | 1.400(7) | C(21)–C(26)       | 1.397(7) |
| C(2)–C(15)            | 1.392(7) | C(10)–C(11)          | 1.429(7) | C(22)–C(23)       | 1.385(7) |
| C(3)–C(4)             | 1.431(7) | C(10)–C(16)          | 1.423(6) | C(23)–C(24)       | 1.369(8) |
| C(3)–C(17)            | 1.417(7) | C(11)–C(12)          | 1.349(8) | C(24)–C(25)       | 1.404(7) |
| C(4)–C(5)             | 1.352(8) | C(12)–C(13)          | 1.434(7) | C(25)–C(26)       | 1.362(7) |
| <i>Bond angles</i>    |          |                      |          |                   |          |
| C(1)–N(1)–C(2)        | 120.8(5) | C(6)–C(16)–C(17)     | 120.1(4) | C(15)–C(2)–C(3)   | 120.5(4) |
| N(1)–C(1)–C(21)       | 121.9(5) | C(7)–C(6)–C(5)       | 121.7(5) | C(15)–C(14)–C(13) | 120.4(4) |
| C(3)–C(2)–N(1)        | 118.2(4) | C(7)–C(6)–C(16)      | 119.6(5) | C(16)–C(6)–C(5)   | 118.7(5) |
| C(15)–C(2)–N(1)       | 121.1(5) | C(7)–C(8)–C(9)       | 120.4(5) | C(16)–C(10)–C(11) | 119.1(5) |
| O(1)–C(22)–C(21)      | 121.2(4) | C(8)–C(7)–C(6)       | 120.5(5) | C(17)–C(3)–C(4)   | 118.4(5) |
| O(1)–C(22)–C(23)      | 118.8(5) | C(8)–C(9)–C(10)      | 120.8(5) | C(17)–C(13)–C(12) | 119.3(5) |
| C(24)–C(25)–Br(1)     | 118.5(4) | C(9)–C(10)–C(11)     | 122.1(5) | C(22)–C(21)–C(1)  | 121.6(5) |
| C(26)–C(25)–Br(1)     | 120.7(4) | C(9)–C(10)–C(16)     | 118.7(5) | C(23)–C(22)–C(21) | 120.0(5) |
| C(2)–C(3)–C(4)        | 123.3(4) | C(10)–C(16)–C(17)    | 119.9(5) | C(23)–C(24)–C(25) | 119.3(5) |
| C(2)–C(3)–C(17)       | 118.2(4) | C(11)–C(12)–C(13)    | 121.4(5) | C(24)–C(23)–C(22) | 120.8(5) |
| C(3)–C(17)–C(13)      | 120.6(5) | C(12)–C(11)–C(10)    | 121.0(5) | C(25)–C(26)–C(21) | 120.5(5) |
| C(3)–C(17)–C(16)      | 120.1(5) | C(13)–C(17)–C(16)    | 119.3(4) | C(26)–C(21)–C(1)  | 119.7(5) |
| C(4)–C(5)–C(6)        | 121.1(5) | C(14)–C(13)–C(12)    | 121.6(5) | C(26)–C(21)–C(22) | 118.7(5) |
| C(5)–C(4)–C(3)        | 121.6(5) | C(14)–C(13)–C(17)    | 119.1(5) | C(26)–C(25)–C(24) | 120.8(5) |
| C(6)–C(16)–C(10)      | 120.0(5) | C(14)–C(15)–C(2)     | 121.1(5) |                   |          |
| <i>Torsion angles</i> |          |                      |          |                   |          |
| C(1)–N(1)–C(2)–C(3)   | 149.5(5) | C(1)–N(1)–C(2)–C(15) | –34.2(9) |                   |          |

**Table S3** Selected bond lengths (Å) and bond angles (°) for **5**

| <i>Bond lengths</i>   |            |                      |            |                   |            |
|-----------------------|------------|----------------------|------------|-------------------|------------|
| Cl(1)–C(23)           | 1.729(2)   | C(5)–C(6)            | 1.433(3)   | C(13)–C(14)       | 1.400(3)   |
| Cl(2)–C(25)           | 1.740(2)   | C(6)–C(7)            | 1.400(3)   | C(13)–C(17)       | 1.432(3)   |
| O(1)–C(22)            | 1.337(3)   | C(6)–C(16)           | 1.423(3)   | C(14)–C(15)       | 1.375(3)   |
| N(1)–C(1)             | 1.284(3)   | C(7)–C(8)            | 1.389(4)   | C(16)–C(17)       | 1.427(3)   |
| N(1)–C(2)             | 1.412(3)   | C(8)–C(9)            | 1.381(3)   | C(21)–C(22)       | 1.417(3)   |
| C(1)–C(21)            | 1.454(3)   | C(9)–C(10)           | 1.403(3)   | C(21)–C(26)       | 1.403(3)   |
| C(2)–C(3)             | 1.412(3)   | C(10)–C(11)          | 1.439(3)   | C(22)–C(23)       | 1.393(3)   |
| C(2)–C(15)            | 1.403(3)   | C(10)–C(16)          | 1.416(3)   | C(23)–C(24)       | 1.381(3)   |
| C(3)–C(4)             | 1.434(3)   | C(11)–C(12)          | 1.355(3)   | C(24)–C(25)       | 1.392(3)   |
| C(3)–C(17)            | 1.417(3)   | C(12)–C(13)          | 1.423(3)   | C(25)–C(26)       | 1.369(3)   |
| C(4)–C(5)             | 1.353(3)   |                      |            |                   |            |
| <i>Bond angles</i>    |            |                      |            |                   |            |
| C(1)–N(1)–C(2)        | 121.82(18) | C(6)–C(16)–C(17)     | 119.5(2)   | C(14)–C(15)–C(2)  | 120.8(2)   |
| N(1)–C(1)–C(21)       | 120.99(19) | C(7)–C(6)–C(5)       | 123.0(2)   | C(15)–C(2)–C(3)   | 119.7(2)   |
| C(3)–C(2)–N(1)        | 117.38(17) | C(7)–C(6)–C(16)      | 118.8(2)   | C(15)–C(14)–C(13) | 121.81(18) |
| C(15)–C(2)–N(1)       | 122.71(19) | C(8)–C(7)–C(6)       | 120.9(2)   | C(16)–C(6)–C(5)   | 118.3(2)   |
| O(1)–C(22)–C(23)      | 120.18(19) | C(8)–C(9)–C(10)      | 120.9(2)   | C(16)–C(10)–C(11) | 119.2(2)   |
| O(1)–C(22)–C(21)      | 121.7(2)   | C(9)–C(8)–C(7)       | 120.4(2)   | C(16)–C(17)–C(13) | 118.9(2)   |
| C(22)–C(23)–Cl(1)     | 119.26(17) | C(9)–C(10)–C(11)     | 121.9(2)   | C(17)–C(3)–C(4)   | 118.3(2)   |
| C(24)–C(23)–Cl(1)     | 118.63(17) | C(9)–C(10)–C(16)     | 119.0(2)   | C(22)–C(21)–C(1)  | 120.8(2)   |
| C(24)–C(25)–Cl(2)     | 118.75(18) | C(10)–C(16)–C(6)     | 120.0(2)   | C(23)–C(22)–C(21) | 118.1(2)   |
| C(26)–C(25)–Cl(2)     | 120.15(17) | C(10)–C(16)–C(17)    | 120.51(18) | C(23)–C(24)–C(25) | 118.9(2)   |
| C(2)–C(3)–C(4)        | 122.5(2)   | C(11)–C(12)–C(13)    | 122.30(19) | C(24)–C(23)–C(22) | 122.09(19) |
| C(2)–C(3)–C(17)       | 119.17(18) | C(12)–C(11)–C(10)    | 120.2(2)   | C(25)–C(26)–C(21) | 120.25(19) |
| C(3)–C(17)–C(13)      | 120.5(2)   | C(12)–C(13)–C(17)    | 119.0(2)   | C(26)–C(21)–C(1)  | 119.59(19) |
| C(3)–C(17)–C(16)      | 120.65(18) | C(14)–C(13)–C(12)    | 123.06(18) | C(26)–C(21)–C(22) | 119.6(2)   |
| C(4)–C(5)–C(6)        | 122.05(19) | C(14)–C(13)–C(17)    | 118.0(2)   | C(26)–C(25)–C(24) | 121.1(2)   |
| C(5)–C(4)–C(3)        | 121.0(2)   |                      |            |                   |            |
| <i>Torsion angles</i> |            |                      |            |                   |            |
| C(1)–N(1)–C(2)–C(3)   | 160.6(2)   | C(1)–N(1)–C(2)–C(15) | –24.6(3)   |                   |            |

**Table S4** Selected bond lengths (Å) and bond angles (°) for **6**

| <i>Bond lengths</i>   |          |                      |          |                   |          |
|-----------------------|----------|----------------------|----------|-------------------|----------|
| Br(1)–C(23)           | 1.888(5) | C(5)–C(6)            | 1.439(6) | C(13)–C(14)       | 1.392(6) |
| Br(2)–C(25)           | 1.898(4) | C(6)–C(7)            | 1.401(6) | C(13)–C(17)       | 1.411(6) |
| O(1)–C(22)            | 1.324(5) | C(6)–C(16)           | 1.403(6) | C(14)–C(15)       | 1.384(7) |
| N(1)–C(1)             | 1.280(6) | C(7)–C(8)            | 1.382(7) | C(16)–C(17)       | 1.430(6) |
| N(1)–C(2)             | 1.413(6) | C(8)–C(9)            | 1.387(8) | C(21)–C(22)       | 1.415(6) |
| C(1)–C(21)            | 1.452(6) | C(9)–C(10)           | 1.400(7) | C(21)–C(26)       | 1.401(6) |
| C(2)–C(3)             | 1.415(6) | C(10)–C(11)          | 1.434(7) | C(22)–C(23)       | 1.399(7) |
| C(2)–C(15)            | 1.390(7) | C(10)–C(16)          | 1.426(6) | C(23)–C(24)       | 1.373(6) |
| C(3)–C(4)             | 1.427(6) | C(11)–C(12)          | 1.348(7) | C(24)–C(25)       | 1.383(7) |
| C(3)–C(17)            | 1.414(6) | C(12)–C(13)          | 1.434(7) | C(25)–C(26)       | 1.371(7) |
| C(4)–C(5)             | 1.353(6) |                      |          |                   |          |
| <i>Bond angles</i>    |          |                      |          |                   |          |
| C(1)–N(1)–C(2)        | 121.2(4) | C(6)–C(16)–C(17)     | 120.6(4) | C(14)–C(15)–C(2)  | 121.0(4) |
| N(1)–C(1)–C(21)       | 121.6(5) | C(7)–C(6)–C(5)       | 122.1(5) | C(15)–C(2)–C(3)   | 120.0(4) |
| C(3)–C(2)–N(1)        | 117.5(4) | C(7)–C(6)–C(16)      | 119.4(4) | C(15)–C(14)–C(13) | 121.0(5) |
| C(15)–C(2)–N(1)       | 122.4(4) | C(8)–C(7)–C(6)       | 120.8(5) | C(16)–C(6)–C(5)   | 118.5(4) |
| O(1)–C(22)–C(21)      | 121.7(5) | C(8)–C(9)–C(10)      | 121.0(5) | C(16)–C(10)–C(11) | 119.5(4) |
| O(1)–C(22)–C(23)      | 120.4(5) | C(9)–C(8)–C(7)       | 120.2(4) | C(16)–C(17)–C(13) | 119.7(4) |
| C(22)–C(23)–Br(1)     | 118.3(3) | C(9)–C(10)–C(11)     | 122.0(4) | C(17)–C(3)–C(4)   | 119.9(4) |
| C(24)–C(23)–Br(1)     | 119.8(4) | C(9)–C(10)–C(16)     | 118.6(5) | C(22)–C(21)–C(1)  | 121.1(4) |
| C(24)–C(25)–Br(2)     | 119.5(3) | C(10)–C(16)–C(6)     | 120.0(4) | C(23)–C(22)–C(21) | 117.9(4) |
| C(26)–C(25)–Br(2)     | 119.3(4) | C(10)–C(16)–C(17)    | 119.4(4) | C(23)–C(24)–C(25) | 119.3(4) |
| C(2)–C(3)–C(4)        | 121.9(4) | C(11)–C(12)–C(13)    | 121.6(5) | C(24)–C(23)–C(22) | 121.9(4) |
| C(2)–C(3)–C(17)       | 118.2(4) | C(12)–C(11)–C(10)    | 120.6(4) | C(25)–C(26)–C(21) | 120.1(4) |
| C(3)–C(17)–C(13)      | 121.3(4) | C(12)–C(13)–C(17)    | 119.3(4) | C(26)–C(21)–C(1)  | 119.1(4) |
| C(3)–C(17)–C(16)      | 118.9(4) | C(14)–C(13)–C(12)    | 122.3(4) | C(26)–C(21)–C(22) | 119.7(4) |
| C(4)–C(5)–C(6)        | 121.5(4) | C(14)–C(13)–C(17)    | 118.4(4) | C(26)–C(25)–C(24) | 121.1(4) |
| C(5)–C(4)–C(3)        | 120.5(4) |                      |          |                   |          |
| <i>Torsion angles</i> |          |                      |          |                   |          |
| C(1)–N(1)–C(2)–C(3)   | 155.9(4) | C(1)–N(1)–C(2)–C(15) | –28.2(6) |                   |          |

**Table S5** Selected bond lengths (Å) and bond angles (°) for **7**

| <b>Molecule A</b>   |          | <b>Molecule B</b>   |          |
|---------------------|----------|---------------------|----------|
| <i>Bond lengths</i> |          |                     |          |
| O(2)–C(27)          | 1.419(5) | O(2A)–C(27A)        | 1.421(5) |
| C(22)–O(1)          | 1.353(5) | C(22A)–O(1A)        | 1.353(5) |
| C(23)–O(2)          | 1.367(5) | C(23A)–O(2A)        | 1.376(5) |
| N(1)–C(1)           | 1.292(5) | N(1A)–C(1A)         | 1.290(5) |
| N(1)–C(2)           | 1.409(5) | N(1A)–C(2A)         | 1.412(5) |
| C(1)–C(21)          | 1.442(6) | C(1A)–C(21A)        | 1.445(6) |
| C(2)–C(3)           | 1.414(6) | C(2A)–C(3A)         | 1.401(6) |
| C(2)–C(15)          | 1.388(6) | C(2A)–C(15A)        | 1.388(6) |
| C(3)–C(4)           | 1.425(5) | C(3A)–C(4A)         | 1.446(5) |
| C(3)–C(17)          | 1.432(5) | C(3A)–C(17A)        | 1.416(5) |
| C(4)–C(5)           | 1.352(6) | C(4A)–C(5A)         | 1.349(6) |
| C(5)–C(6)           | 1.431(5) | C(5A)–C(6A)         | 1.433(6) |
| C(6)–C(7)           | 1.388(6) | C(6A)–C(7A)         | 1.385(6) |
| C(6)–C(16)          | 1.419(5) | C(6A)–C(16A)        | 1.421(5) |
| C(7)–C(8)           | 1.384(6) | C(7A)–C(8A)         | 1.380(7) |
| C(8)–C(9)           | 1.378(6) | C(8A)–C(9A)         | 1.386(6) |
| C(9)–C(10)          | 1.398(6) | C(9A)–C(10A)        | 1.401(6) |
| C(10)–C(11)         | 1.426(6) | C(10A)–C(11A)       | 1.422(6) |
| C(10)–C(16)         | 1.427(5) | C(10A)–C(16A)       | 1.426(6) |
| C(11)–C(12)         | 1.347(6) | C(11A)–C(12A)       | 1.352(6) |
| C(12)–C(13)         | 1.441(6) | C(12A)–C(13A)       | 1.425(6) |
| C(13)–C(14)         | 1.396(6) | C(13A)–C(14A)       | 1.393(6) |
| C(13)–C(17)         | 1.415(5) | C(13A)–C(17A)       | 1.415(5) |
| C(14)–C(15)         | 1.369(6) | C(14A)–C(15A)       | 1.371(6) |
| C(16)–C(17)         | 1.417(6) | C(16A)–C(17A)       | 1.421(6) |
| C(21)–C(22)         | 1.395(6) | C(21A)–C(22A)       | 1.400(6) |
| C(21)–C(26)         | 1.410(6) | C(21A)–C(26A)       | 1.412(6) |
| C(22)–C(23)         | 1.410(6) | C(22A)–C(23A)       | 1.387(6) |
| C(23)–C(24)         | 1.374(5) | C(23A)–C(24A)       | 1.380(6) |
| C(24)–C(25)         | 1.390(6) | C(24A)–C(25A)       | 1.394(6) |
| C(25)–C(26)         | 1.365(6) | C(25A)–C(26A)       | 1.348(6) |
| <i>Bond angles</i>  |          |                     |          |
| C(1)–N(1)–C(2)      | 121.7(3) | C(1A)–N(1A)–C(2A)   | 120.7(4) |
| N(1)–C(1)–C(21)     | 122.4(4) | N(1A)–C(1A)–C(21A)  | 122.5(4) |
| C(3)–C(2)–N(1)      | 117.2(3) | C(3A)–C(2A)–N(1A)   | 118.0(4) |
| C(15)–C(2)–N(1)     | 123.0(4) | C(15A)–C(2A)–N(1A)  | 122.3(4) |
| O(1)–C(22)–C(21)    | 122.3(4) | O(1A)–C(22A)–C(21A) | 121.7(4) |
| O(1)–C(22)–C(23)    | 117.7(3) | O(1A)–C(22A)–C(23A) | 118.3(3) |
| O(2)–C(23)–C(22)    | 115.3(3) | O(2A)–C(23A)–C(22A) | 115.2(3) |
| O(2)–C(23)–C(24)    | 125.3(4) | O(2A)–C(23A)–C(24A) | 124.7(4) |

|                   |          |                      |          |
|-------------------|----------|----------------------|----------|
| C(23)–O(2)–C(27)  | 116.6(3) | C(23A)–O(2A)–C(27A)  | 116.1(3) |
| C(2)–C(3)–C(4)    | 123.6(4) | C(2A)–C(3A)–C(4A)    | 123.0(4) |
| C(2)–C(3)–C(17)   | 118.4(3) | C(2A)–C(3A)–C(17A)   | 119.0(3) |
| C(3)–C(17)–C(13)  | 120.2(3) | C(3A)–C(17A)–C(13A)  | 120.2(4) |
| C(3)–C(17)–C(16)  | 120.0(3) | C(3A)–C(17A)–C(16A)  | 120.1(3) |
| C(4)–C(5)–C(6)    | 121.3(4) | C(4A)–C(5A)–C(6A)    | 121.6(4) |
| C(5)–C(4)–C(3)    | 121.9(4) | C(5A)–C(4A)–C(3A)    | 121.4(4) |
| C(6)–C(16)–C(17)  | 120.3(3) | C(6A)–C(16A)–C(17A)  | 120.5(3) |
| C(7)–C(6)–C(5)    | 122.3(4) | C(7A)–C(6A)–C(5A)    | 122.7(4) |
| C(7)–C(6)–C(16)   | 119.2(4) | C(7A)–C(6A)–C(16A)   | 119.2(4) |
| C(8)–C(7)–C(6)    | 121.1(4) | C(8A)–C(7A)–C(6A)    | 121.8(4) |
| C(8)–C(9)–C(10)   | 120.6(4) | C(8A)–C(9A)–C(10A)   | 121.7(4) |
| C(9)–C(8)–C(7)    | 120.6(4) | C(9A)–C(8A)–C(7A)    | 119.4(4) |
| C(9)–C(10)–C(11)  | 122.4(4) | C(9A)–C(10A)–C(11A)  | 123.1(4) |
| C(9)–C(10)–C(16)  | 119.2(4) | C(9A)–C(10A)–C(16A)  | 118.3(4) |
| C(10)–C(16)–C(6)  | 119.3(4) | C(10A)–C(16A)–C(6A)  | 119.6(4) |
| C(10)–C(16)–C(17) | 120.5(3) | C(10A)–C(16A)–C(17A) | 119.9(3) |
| C(11)–C(12)–C(13) | 121.7(4) | C(11A)–C(12A)–C(13A) | 121.2(4) |
| C(12)–C(11)–C(10) | 121.2(4) | C(12A)–C(11A)–C(10A) | 121.4(4) |
| C(12)–C(13)–C(17) | 118.4(4) | C(12A)–C(13A)–C(17A) | 119.1(4) |
| C(14)–C(13)–C(12) | 122.8(4) | C(14A)–C(13A)–C(12A) | 121.9(4) |
| C(14)–C(13)–C(17) | 118.8(4) | C(14A)–C(13A)–C(17A) | 119.0(4) |
| C(14)–C(15)–C(2)  | 121.8(4) | C(14A)–C(15A)–C(2A)  | 121.8(4) |
| C(15)–C(2)–C(3)   | 119.7(4) | C(15A)–C(2A)–C(3A)   | 119.6(4) |
| C(15)–C(14)–C(13) | 120.9(4) | C(15A)–C(14A)–C(13A) | 120.3(4) |
| C(16)–C(6)–C(5)   | 118.5(4) | C(16A)–C(6A)–C(5A)   | 118.1(4) |
| C(16)–C(10)–C(11) | 118.3(4) | C(16A)–C(10A)–C(11A) | 118.5(4) |
| C(16)–C(17)–C(13) | 119.8(3) | C(16A)–C(17A)–C(13A) | 119.6(3) |
| C(17)–C(3)–C(4)   | 118.0(3) | C(17A)–C(3A)–C(4A)   | 118.1(4) |
| C(22)–C(21)–C(1)  | 121.3(4) | C(22A)–C(21A)–C(1A)  | 121.3(3) |
| C(23)–C(22)–C(21) | 120.0(3) | C(23A)–C(22A)–C(21A) | 120.0(4) |
| C(23)–C(24)–C(25) | 120.9(4) | C(23A)–C(24A)–C(25A) | 119.9(4) |
| C(24)–C(23)–C(22) | 119.4(4) | C(24A)–C(23A)–C(22A) | 120.1(4) |
| C(25)–C(26)–C(21) | 120.8(4) | C(25A)–C(26A)–C(21A) | 120.6(4) |
| C(26)–C(21)–C(1)  | 119.8(4) | C(26A)–C(21A)–C(1A)  | 120.0(4) |
| C(26)–C(21)–C(22) | 118.8(4) | C(26A)–C(21A)–C(22A) | 118.7(4) |
| C(26)–C(25)–C(24) | 120.0(4) | C(26A)–C(25A)–C(24A) | 120.7(4) |

---

*Torsion angles*

|                      |           |                          |          |
|----------------------|-----------|--------------------------|----------|
| C(1)–N(1)–C(2)–C(3)  | –158.2(4) | C(1A)–N(1A)–C(2A)–C(3A)  | 156.0(4) |
| C(1)–N(1)–C(2)–C(15) | 25.6(6)   | C(1A)–N(1A)–C(2A)–C(15A) | –28.3(6) |

---

**Table S6.** Hydrogen bond lengths (Å) and angles (°) for **2**, **3** and **5–7**

| D–H···A                       | <i>d</i> (D–H) | <i>d</i> (H···A) | <i>d</i> (D···A) | ∠(DHA)  |
|-------------------------------|----------------|------------------|------------------|---------|
| <b>2</b>                      | 0.96(5)        | 1.74(5)          | 2.594(3)         | 147(4)  |
| <b>3</b>                      | 1.07(14)       | 1.63(13)         | 2.604(6)         | 148(11) |
| <b>5</b> O(1)–H(1O)···N(1)    | 0.84(4)        | 1.77(3)          | 2.577(2)         | 159(3)  |
| <b>6</b>                      | 0.96(7)        | 1.78(7)          | 2.600(6)         | 141(5)  |
|                               | 0.84           | 1.79             | 2.612(4)         | 167.0   |
| <b>7</b> O(1A)–H(1OA)···N(1A) | 0.84           | 1.90             | 2.607(5)         | 141.7   |

**Table S7.**  $\pi\cdots\pi$  bond lengths (Å) and angles ( $^{\circ}$ ) for **2**, **3** and **5–7<sup>a</sup>**

|                      | Cg( <i>I</i> )       | Cg( <i>J</i> ) <sup>b</sup> | <i>d</i> [Cg( <i>I</i> )–Cg( <i>J</i> )] | $\alpha$   | $\beta$ |       |
|----------------------|----------------------|-----------------------------|------------------------------------------|------------|---------|-------|
| <b>2<sup>b</sup></b> | Cg(1)                | Cg(2) <sup>#1</sup>         | 3.617(2)                                 | 0.17       | 20.43   |       |
|                      | Cg(1)                | Cg(3) <sup>#1</sup>         | 4.1215(18)                               | 0.47       | 34.36   |       |
|                      | Cg(1)                | Cg(4) <sup>#1</sup>         | 3.612(2)                                 | 0.39       | 19.94   |       |
|                      | Cg(2)                | Cg(1) <sup>#2</sup>         | 3.617(2)                                 | 0.17       | 20.29   |       |
|                      | Cg(2)                | Cg(3) <sup>#1</sup>         | 3.621(2)                                 | 0.59       | 20.07   |       |
|                      | Cg(2)                | Cg(4) <sup>#1</sup>         | 4.598(2)                                 | 0.44       | 42.57   |       |
|                      | Cg(2)                | Cg(4) <sup>#2</sup>         | 4.601(2)                                 | 0.44       | 42.63   |       |
|                      | Cg(3)                | Cg(1) <sup>#2</sup>         | 4.1217(18)                               | 0.47       | 34.83   |       |
|                      | Cg(3)                | Cg(2) <sup>#2</sup>         | 3.621(2)                                 | 0.59       | 20.09   |       |
|                      | Cg(3)                | Cg(4) <sup>#2</sup>         | 3.622(2)                                 | 0.26       | 20.34   |       |
|                      | Cg(4)                | Cg(1) <sup>#2</sup>         | 3.612(2)                                 | 0.39       | 20.23   |       |
|                      | Cg(4)                | Cg(2) <sup>#1</sup>         | 4.601(2)                                 | 0.44       | 42.27   |       |
|                      | Cg(4)                | Cg(2) <sup>#2</sup>         | 4.598(2)                                 | 0.44       | 42.41   |       |
|                      | Cg(4)                | Cg(3) <sup>#1</sup>         | 3.622(2)                                 | 0.26       | 20.11   |       |
|                      | <b>3<sup>b</sup></b> | Cg(1)                       | Cg(2) <sup>#2</sup>                      | 3.631(3)   | 0.19    | 20.38 |
|                      |                      | Cg(1)                       | Cg(3) <sup>#2</sup>                      | 4.102(3)   | 0.47    | 33.49 |
| Cg(1)                |                      | Cg(4) <sup>#2</sup>         | 3.617(3)                                 | 0.56       | 19.53   |       |
| Cg(2)                |                      | Cg(1) <sup>#1</sup>         | 3.631(3)                                 | 0.19       | 20.21   |       |
| Cg(2)                |                      | Cg(3) <sup>#2</sup>         | 3.630(3)                                 | 0.36       | 19.81   |       |
| Cg(2)                |                      | Cg(4) <sup>#1</sup>         | 4.643(3)                                 | 0.46       | 42.82   |       |
| Cg(2)                |                      | Cg(4) <sup>#2</sup>         | 4.628(3)                                 | 0.46       | 42.7    |       |
| Cg(3)                |                      | Cg(1) <sup>#1</sup>         | 4.102(3)                                 | 0.47       | 33.9    |       |
| Cg(3)                |                      | Cg(2) <sup>#1</sup>         | 3.629(3)                                 | 0.36       | 19.89   |       |
| Cg(3)                |                      | Cg(4) <sup>#1</sup>         | 3.636(3)                                 | 0.10       | 20.01   |       |
| Cg(4)                |                      | Cg(1) <sup>#1</sup>         | 3.617(3)                                 | 0.56       | 19.83   |       |
| Cg(4)                |                      | Cg(2) <sup>#1</sup>         | 4.627(3)                                 | 0.46       | 42.46   |       |
| Cg(4)                |                      | Cg(2) <sup>#2</sup>         | 4.642(3)                                 | 0.46       | 42.49   |       |
| Cg(4)                |                      | Cg(3) <sup>#2</sup>         | 3.636(3)                                 | 0.10       | 20      |       |
| <b>5<sup>b</sup></b> |                      | Cg(1)                       | Cg(1) <sup>#3</sup>                      | 4.3405(16) | 0.00    | 36.87 |
|                      |                      | Cg(1)                       | Cg(1) <sup>#4</sup>                      | 4.6370(16) | 0.00    | 43.97 |
|                      | Cg(1)                | Cg(2) <sup>#3</sup>         | 3.8427(16)                               | 3.38       | 23.93   |       |
|                      | Cg(1)                | Cg(2) <sup>#4</sup>         | 4.8675(17)                               | 3.38       | 47.36   |       |
|                      | Cg(1)                | Cg(3) <sup>#3</sup>         | 3.7798(15)                               | 3.98       | 26.18   |       |
|                      | Cg(1)                | Cg(4) <sup>#3</sup>         | 3.5778(15)                               | 2.65       | 17.54   |       |
|                      | Cg(2)                | Cg(1) <sup>#3</sup>         | 3.8428(16)                               | 3.38       | 27.17   |       |
|                      | Cg(2)                | Cg(1) <sup>#4</sup>         | 4.8674(17)                               | 3.38       | 49.19   |       |
|                      | Cg(2)                | Cg(2) <sup>#3</sup>         | 4.7646(16)                               | 0.00       | 44.69   |       |
|                      | Cg(2)                | Cg(4) <sup>#3</sup>         | 3.8347(15)                               | 2.57       | 26.52   |       |
|                      | Cg(3)                | Cg(1) <sup>#3</sup>         | 3.7799(15)                               | 3.98       | 24.8    |       |
|                      | Cg(3)                | Cg(5) <sup>#4</sup>         | 4.4971(16)                               | 30.26      | 27.89   |       |
|                      | Cg(4)                | Cg(1) <sup>#3</sup>         | 3.5778(15)                               | 2.65       | 17.03   |       |
|                      | Cg(4)                | Cg(2) <sup>#3</sup>         | 3.8347(15)                               | 2.57       | 24.2    |       |



|                |        |                      |            |       |       |
|----------------|--------|----------------------|------------|-------|-------|
|                | Cg(4)  | Cg(4) <sup>#3</sup>  | 4.3353(15) | 0.00  | 36.8  |
|                | Cg(4)  | Cg(5) <sup>#4</sup>  | 4.0737(15) | 28.87 | 14.3  |
|                | Cg(5)  | Cg(3) <sup>#4</sup>  | 4.4971(16) | 30.26 | 57.7  |
|                | Cg(5)  | Cg(4) <sup>#4</sup>  | 4.0737(15) | 28.87 | 33.6  |
|                | Cg(5)  | Cg(5) <sup>#3</sup>  | 3.8615(15) | 0.00  | 27.48 |
| 6 <sup>b</sup> | Cg(1)  | Cg(2) <sup>#5</sup>  | 3.712(2)   | 0.54  | 23.61 |
|                | Cg(1)  | Cg(3) <sup>#5</sup>  | 4.055(2)   | 1.71  | 31.81 |
|                | Cg(1)  | Cg(4) <sup>#5</sup>  | 3.544(2)   | 0.38  | 15.88 |
|                | Cg(2)  | Cg(1) <sup>#6</sup>  | 3.712(2)   | 0.54  | 23.15 |
|                | Cg(2)  | Cg(3) <sup>#5</sup>  | 3.582(2)   | 1.53  | 16.22 |
|                | Cg(2)  | Cg(4) <sup>#6</sup>  | 4.831(3)   | 0.41  | 44.79 |
|                | Cg(2)  | Cg(4) <sup>#5</sup>  | 4.569(3)   | 0.41  | 41.86 |
|                | Cg(3)  | Cg(1) <sup>#6</sup>  | 4.055(2)   | 1.71  | 33.52 |
|                | Cg(3)  | Cg(2) <sup>#6</sup>  | 3.582(2)   | 1.53  | 15.72 |
|                | Cg(3)  | Cg(4) <sup>#6</sup>  | 3.747(3)   | 1.35  | 23.54 |
|                | Cg(4)  | Cg(1) <sup>#6</sup>  | 3.544(2)   | 0.38  | 15.95 |
|                | Cg(4)  | Cg(2) <sup>#6</sup>  | 4.570(3)   | 0.41  | 41.52 |
|                | Cg(4)  | Cg(2) <sup>#5</sup>  | 4.831(3)   | 0.41  | 45.06 |
|                | Cg(4)  | Cg(3) <sup>#5</sup>  | 3.747(3)   | 1.35  | 23.27 |
| 7 <sup>c</sup> | Cg(1)  | Cg(1) <sup>#1</sup>  | 3.679(2)   | 0.00  | 21.35 |
|                | Cg(1)  | Cg(3) <sup>#1</sup>  | 3.707(2)   | 2.79  | 22.23 |
|                | Cg(1)  | Cg(7) <sup>#1</sup>  | 4.446(2)   | 3.52  | 38.1  |
|                | Cg(1)  | Cg(9) <sup>#2</sup>  | 4.122(2)   | 25.86 | 39.67 |
|                | Cg(2)  | Cg(2) <sup>#3</sup>  | 3.698(2)   | 0.00  | 18.87 |
|                | Cg(2)  | Cg(4) <sup>#3</sup>  | 3.858(2)   | 2.85  | 25.23 |
|                | Cg(2)  | Cg(8) <sup>#3</sup>  | 4.549(2)   | 3.04  | 38.54 |
|                | Cg(2)  | Cg(10) <sup>#4</sup> | 4.089(2)   | 29.08 | 35.04 |
|                | Cg(3)  | Cg(1) <sup>#1</sup>  | 3.707(2)   | 2.79  | 23.86 |
|                | Cg(3)  | Cg(5) <sup>#5</sup>  | 4.409(2)   | 46.31 | 10.41 |
|                | Cg(4)  | Cg(2) <sup>#3</sup>  | 3.858(2)   | 2.85  | 26.31 |
|                | Cg(4)  | Cg(6) <sup>#6</sup>  | 4.389(2)   | 40.79 | 12.65 |
|                | Cg(5)  | Cg(3) <sup>#6</sup>  | 4.409(2)   | 46.31 | 56.71 |
|                | Cg(5)  | Cg(5) <sup>#5</sup>  | 4.913(2)   | 45.76 | 27.57 |
|                | Cg(5)  | Cg(5) <sup>#6</sup>  | 4.913(2)   | 45.76 | 54.39 |
|                | Cg(6)  | Cg(4) <sup>#5</sup>  | 4.389(2)   | 40.79 | 53.39 |
|                | Cg(6)  | Cg(6) <sup>#5</sup>  | 4.912(2)   | 39.75 | 52.41 |
|                | Cg(6)  | Cg(6) <sup>#6</sup>  | 4.912(2)   | 39.75 | 28.84 |
|                | Cg(7)  | Cg(1) <sup>#1</sup>  | 4.446(2)   | 3.52  | 40.63 |
|                | Cg(7)  | Cg(9) <sup>#4</sup>  | 4.497(2)   | 25.06 | 43.61 |
|                | Cg(8)  | Cg(2) <sup>#3</sup>  | 4.549(2)   | 3.04  | 40.78 |
|                | Cg(8)  | Cg(10) <sup>#4</sup> | 4.569(2)   | 27.87 | 41.31 |
|                | Cg(9)  | Cg(1) <sup>#2</sup>  | 4.122(2)   | 25.86 | 14.95 |
|                | Cg(9)  | Cg(7) <sup>#2</sup>  | 4.497(2)   | 25.06 | 29.18 |
|                | Cg(10) | Cg(2) <sup>#4</sup>  | 4.089(2)   | 29.08 | 9.5   |

Cg(10) Cg(8)<sup>#4</sup> 4.569(2) 27.87 25.43

<sup>a</sup> Cg(*I*)–Cg(*J*): distance between ring centroids;  $\alpha$ : dihedral angle between planes Cg(*I*) and Cg(*J*);  $\beta$ : angle Cg(*I*) → Cg(*J*) vector and normal to plane *I*.

<sup>b</sup> Symmetry transformations used to generate equivalent atoms: #1  $-1 + x, y, z$ ; #2  $1 + x, y, z$ ; #3  $1 - x, -y, 1 - z$ ; #4  $1 - x, 1 - y, 1 - z$ ; #5  $x, 1 + y, z$ ; #6  $x, -1 + y, z$ ; #7  $1 - x, 1 - y, 2 - z$ ; #8  $2 - x, 1 - y, 1 - z$ ; #9  $2 - x, 1 - y, 2 - z$ ; #10  $x, 1/2 - y, -1/2 + z$ ; #11  $x, 1/2 - y, 1/2 + z$ . Cg(1): C(2)–C(3)–C(17)–C(13)–C(14)–C(15), Cg(2): C(3)–C(4)–C(5)–C(6)–C(16)–C(17), Cg(3): C(6)–C(7)–C(8)–C(9)–C(10)–C(16), Cg(4): C(10)–C(11)–C(12)–C(13)–C(17)–C(16), Cg(5): C(21)–C(22)–C(23)–C(24)–C(25)–C(26).

<sup>c</sup> Symmetry transformations used to generate equivalent atoms: #1  $1 - x, 1 - y, 2 - z$ ; #2  $1 - x, 1 - y, 1 - z$ ; #3  $2 - x, 1 - y, 1 - z$ ; #4  $2 - x, 1 - y, 2 - z$ ; #5  $x, 1/2 - y, -1/2 + z$ ; #6  $x, 1/2 - y, 1/2 + z$ . Cg(1): C(2)–C(3)–C(17)–C(13)–C(14)–C(15), Cg(2): C(2A)–C(3A)–C(17A)–C(13A)–C(14A)–C(15A), Cg(3): C(3)–C(4)–C(5)–C(6)–C(16)–C(17), Cg(4): C(3A)–C(4A)–C(5A)–C(6A)–C(16A)–C(17A), Cg(5): C(6)–C(7)–C(8)–C(9)–C(10)–C(16), Cg(6): C(6A)–C(7A)–C(8A)–C(9A)–C(10A)–C(16A), Cg(7): C(10)–C(11)–C(12)–C(13)–C(17)–C(16), Cg(8): C(10A)–C(11A)–C(12A)–C(13A)–C(17A)–C(16A), Cg(9): C(21)–C(22)–C(23)–C(24)–C(25)–C(26), Cg(10): C(21A)–C(22A)–C(23A)–C(24A)–C(25A)–C(26A).
